# Supplementary material for: Reaction volume and reaction enthalpy upon aqueous peroxodisulfate dissociation: S2O82-→2SO4•-
Source: Royal Society of Chemistry journal article supplement (doi:10.1039/a909266h), 2000-01-01
Supplement: sda909266h.doc [file sda909266h.doc]

**Quantum yields for peroxodisulfate photolysis, 1, in aqueous solution at 266 nm**

**as a function of temperature:**

| T / K | 1 |
| --- | --- |
| 297.6 | 0.875 |
| 292.6 | 0.769 |
| 283.5 | 0.625 |
| 283.2 | 0.578 |
| 278.2 | 0.566 |

Quantum yields for peroxodisulfate photolysis were considered proportional to the extrapolated initial absorbances at 450 nm, assigned to sulfate radicals. Absolute values were calculated by normalizing the extrapolated initial signal amplitude at 298 K to the revised literature value, 1(298 K)= 0.875

(W. J. Mc Elroy, *J. Phys. Chem.,* 1990, **94**,2435).
